# Supplementary material for: Designing a Z-scheme system based on photocatalyst panels towards separated hydrogen and oxygen production from overall water splitting
Source: Royal Society of Chemistry journal article supplement (doi:10.1039/d1cy01682b), 2021-12-16
Supplement: d1cy01682b1.pdf [file d1cy01682b1.pdf]

## Supporting Information

### Designing Z-scheme system based on photocatalyst panels towards separated Hydrogen and Oxygen production from Overall Water Splitting

**Chaoyi Dong,<sup>a, b</sup> Yue Zhao,<sup>a</sup> Yanpei Luo,<sup>a, b</sup> Hong Wang,<sup>a, b</sup> Hefeng Zhang,<sup>a, b</sup> Xu Zong,<sup>a</sup> Zhaochi Feng,<sup>a</sup> and Can Li<sup>\*a</sup>**

<sup>a</sup>. State Key Laboratory of Catalysis, Dalian National Laboratory for Clean Energy Institute of Chemical Physics, Chinese Academy of Sciences, Zhongshan Road 457, Dalian, 116023 (China) E-mail: C.Li ([canli@dicp.ac.cn](mailto:canli@dicp.ac.cn))

<sup>b</sup>. University of Chinese Academy of Sciences, Beijing 100049 (China)

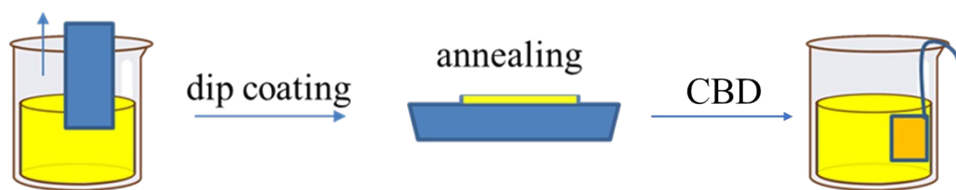

**Fig S1.** Illustration of synthesis method applied for fabricating BiVO<sub>4</sub> panels.

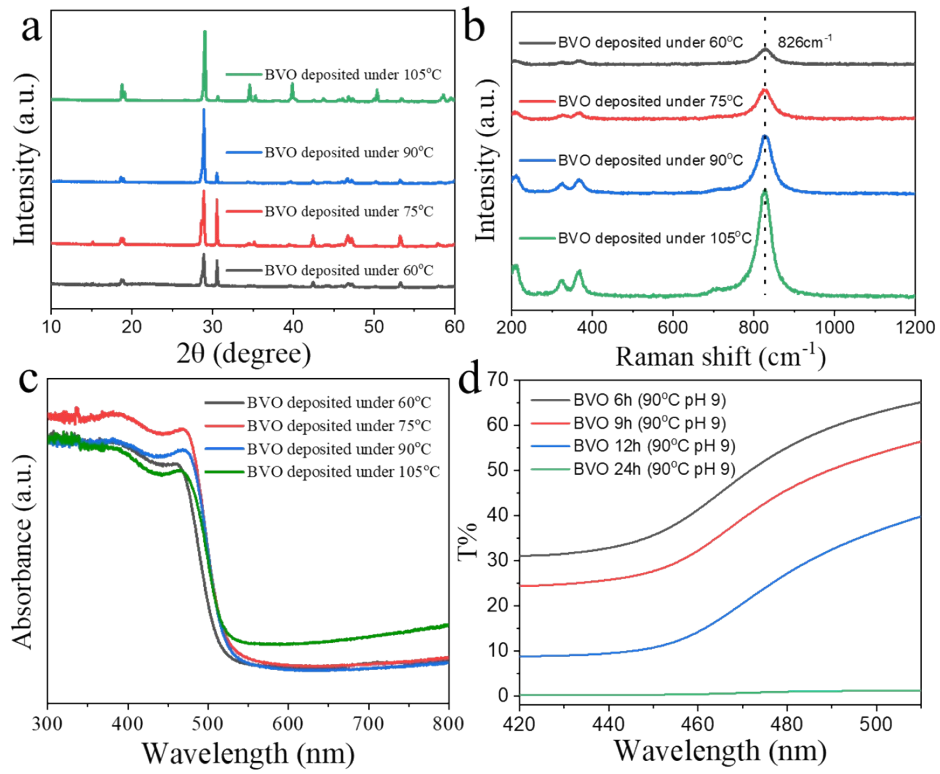

**Fig S2.** (a) XRD patterns (b) Raman spectra (c) UV-Vis DRS pattern and (d) Visible light transmittance spectra of BiVO<sub>4</sub> panels fabricated under different temperature.

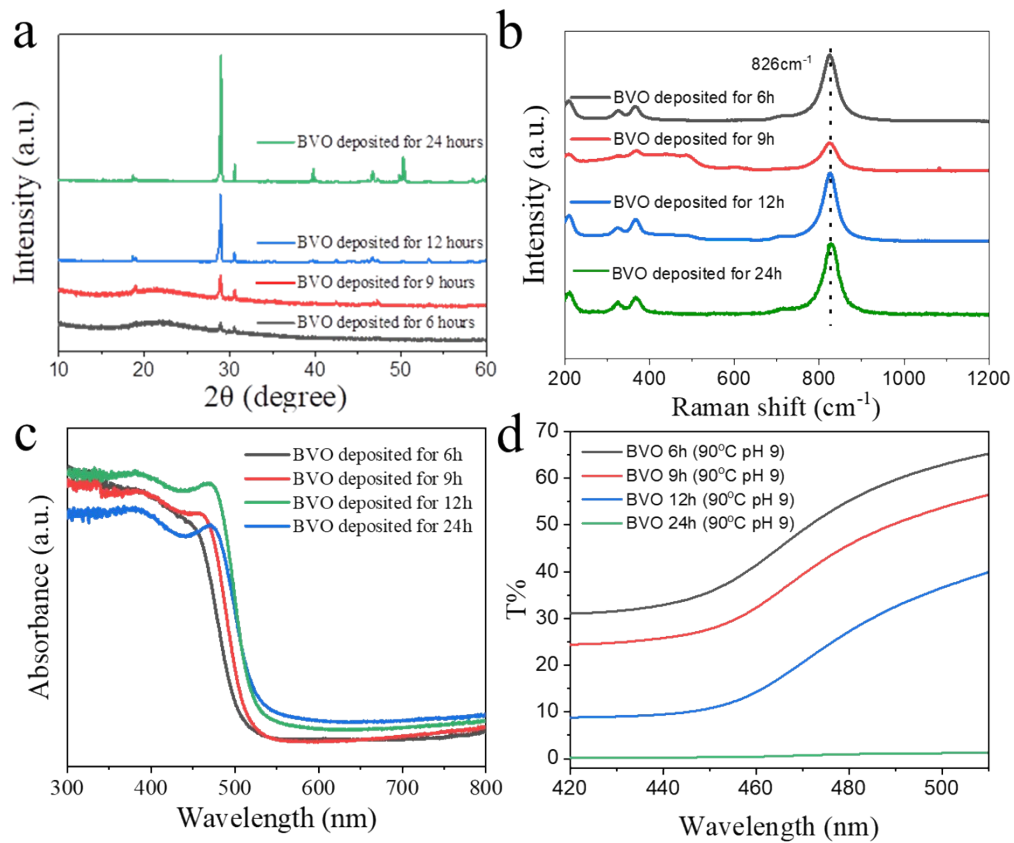

**Fig S3.** (a) XRD patterns (b) Raman spectra (c) UV-Vis DRS spectra and (d) Visible light transmittance spectra of BiVO<sub>4</sub> panels fabricated under different deposition time.

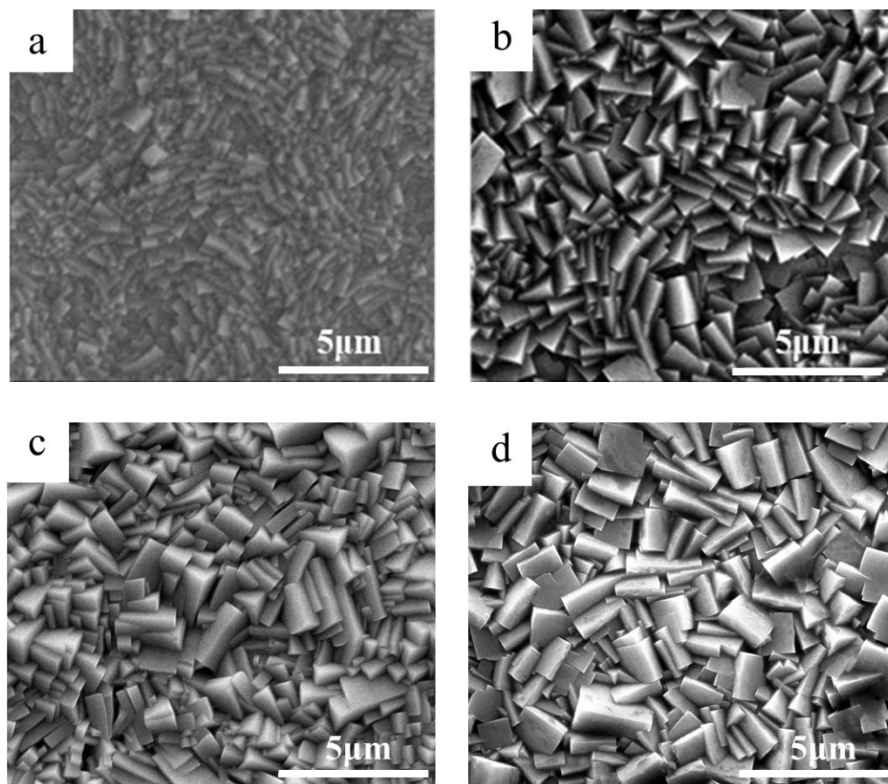

**Fig S4.** SEM images of the BiVO<sub>4</sub> crystals obtained under different deposition temperature: (a) BiVO<sub>4</sub>-60°C (12h pH 9) (b) BiVO<sub>4</sub>-75°C (12h pH 9) (c) BiVO<sub>4</sub>-90°C (12h pH 9) (d) BiVO<sub>4</sub>-105°C (12h pH 9).

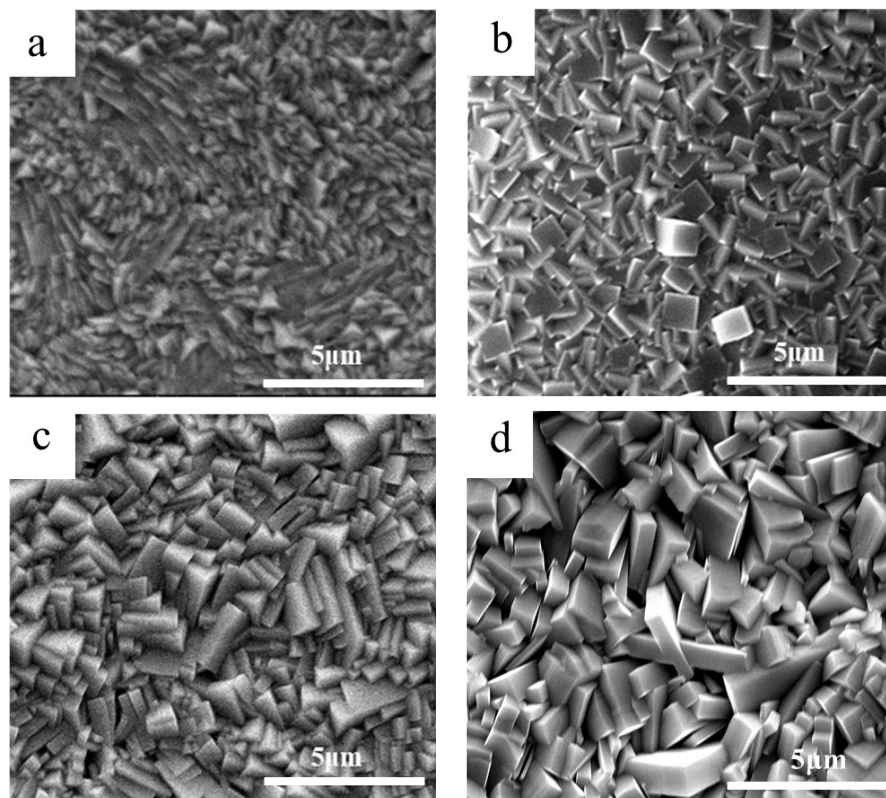

**Fig S5.** SEM images of the BiVO<sub>4</sub> crystals obtained under different deposition time: (a) BiVO<sub>4</sub>-6h (90°C pH 9) (b) BiVO<sub>4</sub>-9h (90°C pH 9) (c) BiVO<sub>4</sub>-12h (90°C pH 9) (d) BiVO<sub>4</sub>-24h (90°C pH 9).

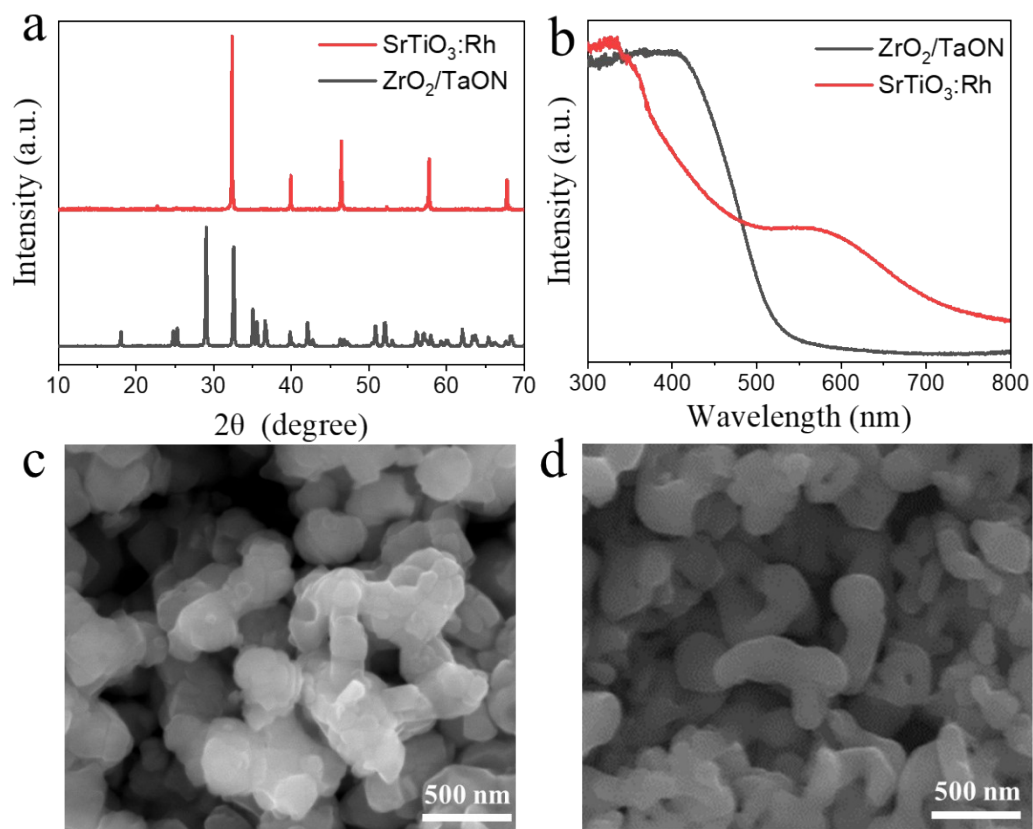

**Fig S6.** (a, b) XRD patterns and UV-Vis DRS of SrTiO<sub>3</sub>: Rh and ZrO<sub>2</sub>/TaON panel (c, d) SEM images of SrTiO<sub>3</sub>: Rh and ZrO<sub>2</sub>/TaON particles.

**Table S1. H<sub>2</sub> evolution rate of HEPPs**

| <b>Sample</b>                                                                 | <b>H<sub>2</sub> evolution rate (μmol/h)</b> |
|-------------------------------------------------------------------------------|----------------------------------------------|
| <b>Ru-SrTiO<sub>3</sub>: Rh panel</b>                                         | <b>18</b>                                    |
| <b>Rh<sub>2-y</sub>Cr<sub>y</sub>O<sub>3</sub>-ZrO<sub>2</sub>/TaON panel</b> | <b>16.7</b>                                  |

**Reaction condition: Area of panel, 4\*4 cm<sup>2</sup>; 100 mL solution containing 5 mM Fe<sup>2+</sup> or [Fe (CN)<sub>6</sub>]<sup>4-</sup> ions, 300 W Xenon lamp (λ>420 nm), temperature 288 K.**



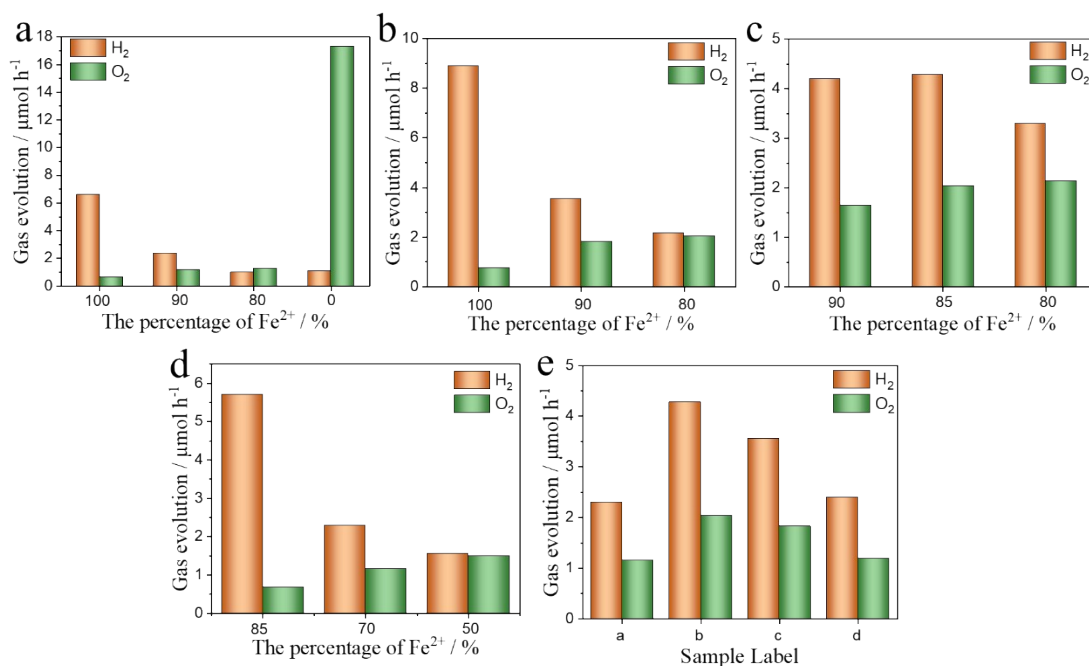

**Fig S7.** Overall water splitting activities dependent on the percentage of Fe<sup>2+</sup> using different BiVO<sub>4</sub> panel (a) Au/CoO<sub>x</sub>-BiVO<sub>4</sub>-pH 9 (12h 90°C) (b) Au/CoO<sub>x</sub>-BiVO<sub>4</sub>-pH 8.5 (12h 90°C) (c) Au/CoO<sub>x</sub>-BiVO<sub>4</sub>-pH 8 (12h 90°C) (d) Au/CoO<sub>x</sub>-BiVO<sub>4</sub>-pH 7.5 (12h 90°C) (e) OWS activities dependent on various BiVO<sub>4</sub> panels.

a: Au/CoO<sub>x</sub>-BiVO<sub>4</sub>-pH 7.5 (12h 90°C) b: Au/CoO<sub>x</sub>-BiVO<sub>4</sub>-pH 8 (12h 90°C) c: Au/CoO<sub>x</sub>-BiVO<sub>4</sub>-pH 8.5 (12h 90°C) d: Au/CoO<sub>x</sub>-BiVO<sub>4</sub>-pH 9 (12h 90°C)

Reaction conditions: Area of panel, 4\*4 cm<sup>2</sup>; 100 mL solution containing a certain amount of redox shuttle ions, 300 W Xenon lamp ( $\lambda > 420$  nm), temperature 288 K, pH=2.4.

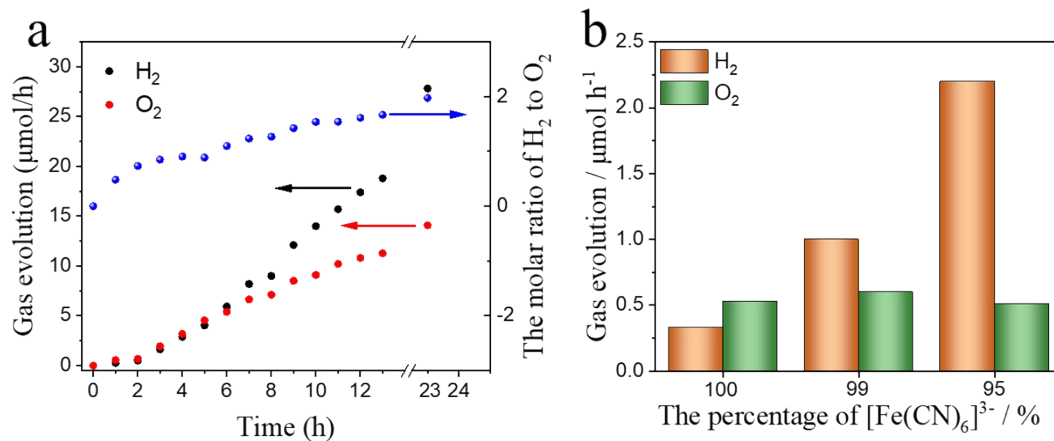

**Fig S8.** (a) Time course of overall water splitting activity on  $\text{Au}/\text{CoO}_x\text{-BiVO}_4\text{-}[\text{Fe}(\text{CN})_6]^{3-/4-}\text{-Rh}_y\text{Cr}_{2-y}\text{O}_3\text{-ZrO}_2/\text{TaON}$  system via the typical measurement (b) Overall water splitting activities dependent on the percentage of  $[\text{Fe}(\text{CN})_6]^{3-}$  on  $\text{Au}/\text{CoO}_x\text{-BiVO}_4\text{-}[\text{Fe}(\text{CN})_6]^{3-/4-}\text{-Rh}_y\text{Cr}_{2-y}\text{O}_3\text{-ZrO}_2/\text{TaON}$  system.

Reaction conditions: Area of panel,  $4 \times 4 \text{ cm}^2$ ; 100 mL solution containing a certain amount of redox shuttle ions, 300 W Xenon lamp ( $\lambda > 420 \text{ nm}$ ), temperature 288 K
